# Supplementary material for: Neonatal Drug Formularies: a Global Scope
Source: Preprints.org preprint supplement (doi:10.20944/preprints202304.0265.v1), 2023-04-12
Supplement: Supplementary file 1 [file supplementary]

## Sheet: Ampicillin
Parameters	Neofax	ANMF	Dutch Formulary	Neonatal Formulary	Lexicomp	BNFc
Is a drug monograph available?	Yes	Yes	No	Yes	Yes	Yes
Dosage based on which parameter (weight/age/route of administration)?	Weight and age	Weight and age	-	Weight and age	Weight and age	Weight and age
Is method of administration indicated?	Yes	Yes	-	Yes	Yes	Yes
Number of routes of administration	2	2	-	3	2	2
Number of age groups	7	7	-	3	10	5
Number of indications (including general dosage)	6	2	-	2	4	3
Differentiation between preterm and term patients	Yes	Yes	-	Yes	Yes	Yes
Are monitoring advice and parameters indicated (if applicable)?	Yes	Yes	-	No	Yes	No
Renal dosage adjustment (if applicable)	No	Yes	-	Yes	Yes	Yes
Hepatic dosage adjustment (if applicable)	N/A	N/A	-	N/A	N/A	N/A
Other dosage adjustments (if applicable)	N/A	N/A	-	N/A	N/A	N/A
Drug-drug interactions mentioned?	No	Yes	-	No	Yes	Yes
Adverse effects mentioned?	Yes	Yes	-	Yes	Yes	Yes
If adverse effects are mentioned, are age-specific effects mentioned?	Yes	No	-	No	Yes	No
Are preparation instructions available?	Yes	Yes	-	Yes	Yes	Yes
Are stability data provided (if applicable)?	Yes	Yes	-	Yes	Yes	No
Optimal concentration of preparation (if applicable)	Yes	No	-	No	No	No
Maximum concentration of preparation (if applicable)	Yes	No	-	No	Yes	No
Are Notable excipients mentioned?	No	No	-	Yes	Yes	No
Are commercial products listed?	No	Yes	-	No	Yes	Yes
Are pharmacokinetic data available?	Yes	Yes	-	No	Yes	No
Version No. / year of review / date of access	2022-11-01	2021-10-01	2022-11-01	8th ed.	2023-02-23	2022-11-01

## Sheet: Gentamicin
Parameters	Neofax	Australasian Neonatal Medicines Formulary (ANMF)	Dutch Pediatric Formulary (DPF)	Neonatal Formulary (NNF)	Pediatric & Neonatal Lexi-Drugs	BNF for Children
Is a drug monograph available?	Yes	Yes	Yes	Yes	Yes	Yes
Dosage based on which parameter (weight/age/route of administration)?	Weight and age	Weight and age	age, route	Weight and age	Weight and age	Weight and age
Is method of administration indicated?	Yes	Yes	Yes	Yes	Yes	Yes
Number of routes of administration	2	2	1	3	4	1
Number of age groups	6	3	5	4	6	2
Number of indications (including general dosage)	3	1	2	2	3	1
Differentiation between preterm and term patients	Yes	Yes	Yes	Yes	Yes	No
Are monitoring advice and parameters indicated (if applicable)?	Yes	Yes	Yes	Yes	Yes	Yes
Renal dosage adjustment (if applicable)	No	Yes	Yes	Yes	Yes	Yes
Hepatic dosage adjustment (if applicable)	N/A	N/A	N/A	N/A	N/A	N/A
Other dosage adjustments (if applicable)	Yes	Yes	No	Yes	Yes	No
Drug-drug interactions mentioned?	No	Yes	partial	No	Yes	Yes
Adverse effects mentioned?	Yes	Yes	Yes	No	Yes	Yes
If adverse effects are mentioned, are age-specific effects mentioned?	No	No	Yes	No	Yes	No
Are preparation instructions available?	No	Yes	No	No	Yes	Yes
Are stability data provided (if applicable)?	No	Yes	No	No	Yes	No
Optimal concentration of preparation (if applicable)	No	No	No	No	Yes	No
Maximum concentration of preparation (if applicable)	N/A	N/A	N/A	N/A	N/A	N/A
Are Notable excipients mentioned?	No	Yes	Yes	No	No	No
Are commercial products listed?	No	Yes	No	No	Yes	Yes
Are pharmacokinetic data available?	Yes	Yes	Yes (TDM)	No	Yes	No
Version No. / year of review / date of access	2022-11-01	2021-02-01	2022-11-01	8th ed.	2023-02-23	2022-11-01

## Sheet: Caffeine (citrate)
Parameters	Neofax	Australasian Neonatal Medicines Formulary (ANMF)	Dutch Pediatric Formulary (DPF)	Neonatal Formulary (NNF)	Pediatric & Neonatal Lexi-Drugs	BNF for Children
Is a drug monograph available?	Yes	Yes	Yes	Yes	Yes	Yes
Dosage based on which parameter (weight/age/route of administration)?	Weight	Weight	weight, route	Weight	Weight, age	Weight
Is method of administration indicated?	Yes	Yes	Yes	No	Yes	Yes
Number of routes of administration	2	2	2	2	2	2
Number of age groups	1	1	1	1	2	1
Number of indications (including general dosage)	2	3	1	2	1	1
Differentiation between preterm and term patients	N/A	N/A	N/A	N/A	N/A	N/A
Are monitoring advice and parameters indicated (if applicable)?	Yes	Yes	Yes	Yes	Yes	Yes
Renal dosage adjustment (if applicable)	Yes	Yes	No	No	Yes	Yes
Hepatic dosage adjustment (if applicable)	Yes	No	No	No	Yes	Yes
Other dosage adjustments (if applicable)	No	No	No	Yes	No	No
Drug-drug interactions mentioned?	No	Yes	Yes	No	Yes	Yes
Adverse effects mentioned?	Yes	Yes	Yes	No	Yes	Yes
If adverse effects are mentioned, are age-specific effects mentioned?	No	No	Yes	Yes	Yes	No
Are preparation instructions available?	Yes	Yes	No	No	Yes	No
Are stability data provided (if applicable)?	Yes	Yes	No	No	Yes	No
Optimal concentration of preparation (if applicable)	No	No	No	No	Yes	No
Maximum concentration of preparation (if applicable)	N/A	N/A	N/A	N/A	N/A	N/A
Are Notable excipients mentioned?	No	Yes	Yes	No	Yes	No
Are commercial products listed?	Yes	Yes	No	Yes	Yes	Yes
Are pharmacokinetic data available?	Yes	Yes	Yes	Yes	Yes	Yes
Version No. / year of review / date of access	2022-11-01	2022-06-01	2022-11-01	8th ed.	2023-02-23	2022-11-01

## Sheet: Poractant alfa
Parameters	Neofax	Australasian Neonatal Medicines Formulary (ANMF)	Dutch Pediatric Formulary (DPF)	Neonatal Formulary (NNF)	Pediatric & Neonatal Lexi-Drugs	BNF for Children
Is a drug monograph available?	Yes	Yes	Yes	Yes	Yes	Yes
Dosage based on which parameter (weight/age/route of administration)?	Weight	Weight	Age, route	Weight	Weight	Weight
Is method of administration indicated?	Yes	Yes	Yes	No	Yes	No
Number of routes of administration	1	1	1	1	1	1
Number of age groups	1	1	1	1	2	1
Number of indications (including general dosage)	1	2	1	1	1	2
Differentiation between preterm and term patients	No	No	N/A	No	Yes	No
Are monitoring advice and parameters indicated (if applicable)?	Yes	Yes	Yes	No	Yes	No
Renal dosage adjustment (if applicable)	N/A	N/A	N/A	N/A	N/A	N/A
Hepatic dosage adjustment (if applicable)	N/A	N/A	N/A	N/A	N/A	N/A
Other dosage adjustments (if applicable)	N/A	N/A	N/A	N/A	N/A	N/A
Drug-drug interactions mentioned?	No	No	Yes (N/A)	No	Yes	No
Adverse effects mentioned?	Yes	Yes	Yes	No	Yes	Yes
If adverse effects are mentioned, are age-specific effects mentioned?	No	No	Yes	Yes	Yes	No
Are preparation instructions available?	Yes	No	No	Yes	Yes	No
Are stability data provided (if applicable)?	Yes	Yes	No	Yes	Yes	No
Optimal concentration of preparation (if applicable)	N/A	N/A	N/A	N/A	N/A	N/A
Maximum concentration of preparation (if applicable)	N/A	N/A	N/A	N/A	N/A	N/A
Are Notable excipients mentioned?	No	No	N/A	No	Yes	No
Are commercial products listed?	Yes	Yes	No	No	Yes	Yes
Are pharmacokinetic data available?	N/A	N/A	N/A	N/A	N/A	N/A
Version No. / year of review / date of access	2022-11-01	2020-12-01	2022-11-01	8th ed.	2023-02-23	2022-11-01

## Sheet: Morphine
Parameters	Neofax	Australasian Neonatal Medicines Formulary (ANMF)	Dutch Pediatric Formulary (DPF)	Neonatal Formulary (NNF)	Pediatric & Neonatal Lexi-Drugs	BNF for Children
Is a drug monograph available?	Yes	Yes	Yes	Yes	Yes	Yes
Dosage based on which parameter (weight/age/route of administration)?	Weight	Weight and age	age, weight and route	Weight, route of administration, individualized	Weight	Weight, age, route of administration
Is method of administration indicated?	Yes	Yes	Yes	Yes	Yes	Yes
Number of routes of administration	4	2	3	3	4	5
Number of age groups	1	3	2	2	1	1
Number of indications (including general dosage)	5	2	2	4	3	3
Differentiation between preterm and term patients	No	Yes	Yes	No	Yes	No
Are monitoring advice and parameters indicated (if applicable)?	Yes	Yes	Yes	No	Yes	Yes
Renal dosage adjustment (if applicable)	No	No	Yes	No	Yes	Yes
Hepatic dosage adjustment (if applicable)	N/A	N/A	N/A	N/A	N/A	N/A
Other dosage adjustments (if applicable)	Yes	No	No	Yes	Yes	No
Drug-drug interactions mentioned?	No	Yes	Yes	No	Yes	Yes
Adverse effects mentioned?	Yes	Yes	Yes	Yes	Yes	Yes
If adverse effects are mentioned, are age-specific effects mentioned?	No	No	Yes	No	Yes	No
Are preparation instructions available?	Yes	Yes	No	Yes	Yes	Yes
Are stability data provided (if applicable)?	Yes	Yes	No	Yes	Yes	No
Optimal concentration of preparation (if applicable)	No	No	No	No	Yes	No
Maximum concentration of preparation (if applicable)	N/A	N/A	N/A	N/A	N/A	N/A
Are Notable excipients mentioned?	No	No	Yes	No	Yes	No
Are commercial products listed?	Yes	Yes	No	Yes	Yes	Yes
Are pharmacokinetic data available?	Yes	Yes	Yes	Yes	Yes	No
Version No. / year of review / date of access	2022-11-01	2021-10-01	2022-11-01	8th ed.	2023-02-23	2022-11-01
		2022-04-01

## Sheet: Vancomycin
Parameters	Neofax	Australasian Neonatal Medicines Formulary (ANMF)	Dutch Pediatric Formulary (DPF)	Neonatal Formulary (NNF)	Pediatric & Neonatal Lexi-Drugs	BNF for Children
Is a drug monograph available?	Yes	Yes	Yes	Yes	Yes	Yes
Dosage based on which parameter (weight/age/route of administration)?	Weight, age, serum creatinine	Weight, age, serum creatinine	weight, age, route	Age, weight	Weight, age, serum creatinine	Age, weight
Is method of administration indicated?	Yes	Yes	Yes	Yes	Yes	Yes
Number of routes of administration	2	1	1	2	3	5
Number of age groups	4	9	4	13	8	4
Number of indications (including general dosage)	6	1	1	2	3	Many
Differentiation between preterm and term patients	Yes	Yes	Yes	Yes	Yes	Yes
Are monitoring advice and parameters indicated (if applicable)?	Yes	Yes	Yes	Yes	Yes	Yes
Renal dosage adjustment (if applicable)	Yes	Yes	No	Yes	Yes	Yes
Hepatic dosage adjustment (if applicable)	N/A	N/A	N/A	N/A	N/A	N/A
Other dosage adjustments (if applicable)	Yes	Yes	No	Yes	Yes	No
Drug-drug interactions mentioned?	No	Yes	Yes	No	Yes	Yes
Adverse effects mentioned?	Yes	Yes	Yes	No	Yes	Yes
If adverse effects are mentioned, are age-specific effects mentioned?	No	No	Yes	No	No	No
Are preparation instructions available?	Yes	Yes	No	Yes	Yes	Yes
Are stability data provided (if applicable)?	Yes	Yes	No	No	Yes	No
Optimal concentration of preparation (if applicable)	No	No	No	No	Yes	No
Maximum concentration of preparation (if applicable)	Yes	No	No	No	Yes	Yes
Are Notable excipients mentioned?	Yes	Yes	Yes	No	Yes	No
Are commercial products listed?	No	Yes	No	No	Yes	Yes
Are pharmacokinetic data available?	Yes	Yes	Yes	Yes	Yes	Yes
Version No. / year of review / date of access	2022-11-01	2020-11-01	2022-11-01	8th ed.	2023-02-23	2022-11-01
		2022-06-01

## Sheet: Furosemide
Parameters	Neofax	Australasian Neonatal Medicines Formulary (ANMF)	Dutch Pediatric Formulary (DPF)	Neonatal Formulary (NNF)	Pediatric & Neonatal Lexi-Drugs	BNF for Children
Is a drug monograph available?	Yes	Yes	Yes	Yes	Yes	Yes
Dosage based on which parameter (weight/age/route of administration)?	Weight and age	Weight and age	age, route	Weight	Weight and age	Weight and age
Is method of administration indicated?	Yes	Yes	Yes	Yes	Yes	Yes
Number of routes of administration	3	2	2	3	3	2
Number of age groups	3	4	2	1	3	2
Number of indications (including general dosage)	3	5	2	3	2	3
Differentiation between preterm and term patients	Yes	Yes	Yes	Yes	Yes	Yes
Are monitoring advice and parameters indicated (if applicable)?	Yes	Yes	Yes	No	Yes	Yes
Renal dosage adjustment (if applicable)	N/A	N/A	N/A	N/A	N/A	N/A
Hepatic dosage adjustment (if applicable)	N/A	N/A	N/A	N/A	N/A	N/A
Other dosage adjustments (if applicable)	No	Yes	No	No	No	No
Drug-drug interactions mentioned?	No	Yes	Yes	Yes	Yes	Yes
Adverse effects mentioned?	Yes	Yes	Yes	No	Yes	Yes
If adverse effects are mentioned, are age-specific effects mentioned?	Yes	No	Yes	Yes	Yes	No
Are preparation instructions available?	Yes	Yes	No	Yes	Yes	Yes
Are stability data provided (if applicable)?	Yes	Yes	No	No	Yes	No
Optimal concentration of preparation (if applicable)	No	No	No	Yes	Yes	Yes
Maximum concentration of preparation (if applicable)	N/A	N/A	N/A	N/A	N/A	N/A
Are Notable excipients mentioned?	No	Yes	Yes	Yes	Yes	Yes
Are commercial products listed?	No	Yes	No	No	Yes	Yes
Are pharmacokinetic data available?	Yes	Yes	Yes	Yes	Yes	No
Version No. / year of review / date of access	2022-11-01	2021-05-01	2022-11-01	8th ed.	2023-02-23	2022-11-01

## Sheet: Fentanyl
Parameters	Neofax	Australasian Neonatal Medicines Formulary (ANMF)	Dutch Pediatric Formulary (DPF)	Neonatal Formulary (NNF)	Pediatric & Neonatal Lexi-Drugs	BNF for Children
Is a drug monograph available?	Yes	Yes	Yes	Yes	Yes	Yes
Dosage based on which parameter (weight/age/route of administration)?	Weight	Weight	weight, age, route	Weight	Weight, age	Weight
Is method of administration indicated?	Yes	Yes	Yes	Yes	Yes	No
Number of routes of administration	1	1	1	1	3	1
Number of age groups	1	1	2	1	2	1
Number of indications (including general dosage)	3	2	1	2	3	2
Differentiation between preterm and term patients	No	No	Yes	No	Yes	No
Are monitoring advice and parameters indicated (if applicable)?	Yes	Yes	Yes	No	Yes	Yes
Renal dosage adjustment (if applicable)	No	No	N/A	No	Yes	Yes
Hepatic dosage adjustment (if applicable)	N/A	N/A	N/A	N/A	N/A	N/A
Other dosage adjustments (if applicable)	No	Yes	N/A	Yes	Yes	No
Drug-drug interactions mentioned?	No	Yes	Yes	No	Yes	Yes
Adverse effects mentioned?	Yes	Yes	Yes	No	Yes	Yes
If adverse effects are mentioned, are age-specific effects mentioned?	No	No	Yes	No	Yes	Yes
Are preparation instructions available?	Yes	Yes	No	Yes	Yes	Yes
Are stability data provided (if applicable)?	Yes	Yes	No	No	Yes	No
Optimal concentration of preparation (if applicable)	Yes	No	No	Yes	Yes	No
Maximum concentration of preparation (if applicable)	N/A	N/A	N/A	N/A	N/A	N/A
Are Notable excipients mentioned?	No	No	Yes	No	Yes	No
Are commercial products listed?	No	Yes	No	No	Yes	Yes
Are pharmacokinetic data available?	Yes	Yes	Yes	Yes	Yes	No
Version No. / year of review / date of access	2022-11-01	2021-08-01	2022-11-01	8th ed.	2023-02-23	2022-11-01

## Sheet: Midazolam
Parameters	Neofax	Australasian Neonatal Medicines Formulary (ANMF)	Dutch Pediatric Formulary (DPF)	Neonatal Formulary (NNF)	Pediatric & Neonatal Lexi-Drugs	BNF for Children
Is a drug monograph available?	Yes	Yes	Yes	Yes	Yes	Yes
Dosage based on which parameter (weight/age/route of administration)?	Weight	Weight	age, and disease (hypothermia), route	Weight	Weight, age	Weight, age
Is method of administration indicated?	Yes	Yes	Yes	Yes	Yes	Yes
Number of routes of administration	5	5	3	5	2	2
Number of age groups	1	1	2	1	3	3
Number of indications (including general dosage)	3	2	3	2	3	3
Differentiation between preterm and term patients	No	No	Yes	No	Yes	Yes
Are monitoring advice and parameters indicated (if applicable)?	Yes	Yes	Yes	Yes	Yes	Yes
Renal dosage adjustment (if applicable)	No	No	No	No	No	Yes
Hepatic dosage adjustment (if applicable)	No	Yes	No	No	No	Yes
Other dosage adjustments (if applicable)	Yes	Yes	Yes	No	Yes	No
Drug-drug interactions mentioned?	No	Yes	Yes	No	Yes	Yes
Adverse effects mentioned?	Yes	Yes	Yes	Yes	Yes	Yes
If adverse effects are mentioned, are age-specific effects mentioned?	Yes	Yes	Yes	Yes	Yes	No
Are preparation instructions available?	Yes	Yes	No	Yes	Yes	Yes
Are stability data provided (if applicable)?	Yes	Yes	No	Yes	Yes	No
Optimal concentration of preparation (if applicable)	Yes	No	No	No	Yes	Yes
Maximum concentration of preparation (if applicable)	No	No	No	No	Yes	Yes
Are Notable excipients mentioned?	Yes	Yes	Yes	Yes	Yes	No
Are commercial products listed?	Yes	Yes	No	Yes	Yes	Yes
Are pharmacokinetic data available?	Yes	Yes	Yes	Yes	Yes	No
Version No. / year of review / date of access	2022-11-01	2021-09-01	2022-11-01	8th ed.	2023-02-23	2022-11-01

## Sheet: Acetaminophen-Paracetamol
Parameters	Neofax	Australasian Neonatal Medicines Formulary (ANMF)	Dutch Pediatric Formulary (DPF)	Neonatal Formulary (NNF)	Pediatric & Neonatal Lexi-Drugs	BNF for Children
Is a drug monograph available?	Yes	Yes	Yes	Yes	Yes	Yes
Dosage based on which parameter (weight/age/route of administration)?	Weight, age	Weight and age	weight, age and route	Weight, age and route	Weight, age and route	Weight, age and route
Is method of administration indicated?	Yes	Yes	Yes	Yes	Yes	Yes
Number of routes of administration	3	3	3	3	3	3
Number of age groups	3	2	3	3	Many (depending on route and indication)	3
Number of indications (including general dosage)	2	3	2	3	4	2
Differentiation between preterm and term patients	Yes	No	Yes	Yes	Yes	Yes
Are monitoring advice and parameters indicated (if applicable)?	Yes	Yes	Yes	Yes	Yes	No
Renal dosage adjustment (if applicable)	No	Yes	No	No	Yes	Yes
Hepatic dosage adjustment (if applicable)	No	Yes	No	No	Yes	Yes
Other dosage adjustments (if applicable)	No	Yes	No	Yes	No	No
Drug-drug interactions mentioned?	No	Yes	Yes	No	Yes	Yes
Adverse effects mentioned?	Yes	Yes	Yes	No	Yes	Yes
If adverse effects are mentioned, are age-specific effects mentioned?	No	No	No	No	Yes	No
Are preparation instructions available?	No	Yes	No	Yes	Yes	Yes
Are stability data provided (if applicable)?	Yes	Yes	No	Yes	Yes	No
Optimal concentration of preparation (if applicable)	N/A	N/A	N/A	N/A	N/A	N/A
Maximum concentration of preparation (if applicable)	N/A	N/A	N/A	N/A	N/A	N/A
Are Notable excipients mentioned?	No	No	Yes	Yes	Yes	No
Are commercial products listed?	No	Yes	No	No	Yes	Yes
Are pharmacokinetic data available?	Yes	Yes	Yes	Yes	Yes	No
Version No. / year of review / date of access	2022-11-01	2022-02-01	2022-11-01	8th ed.	2023-02-23	2022-11-01
